# Supplementary material for: Translation of the 27-gene immuno-oncology test (IO score) to predict outcomes in immune checkpoint inhibitor treated metastatic urothelial cancer patients
Source: Springer Nature journal article supplement (doi:10.1186/s12967-022-03563-9), 2022-08-16

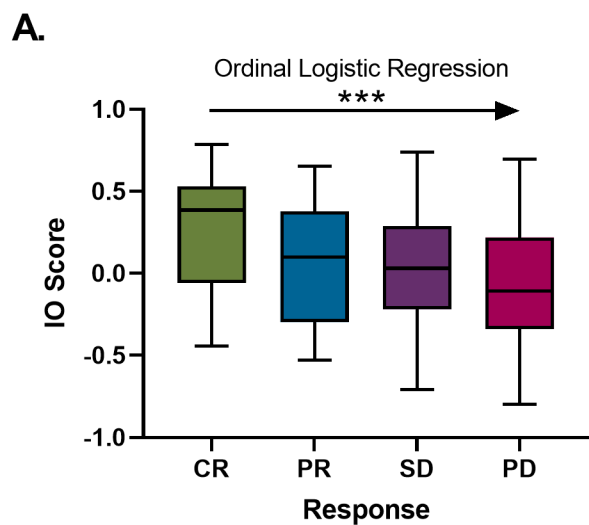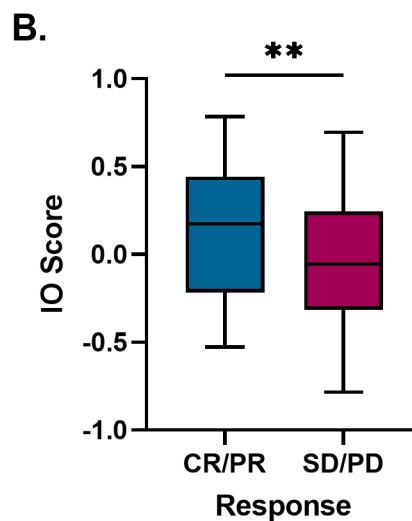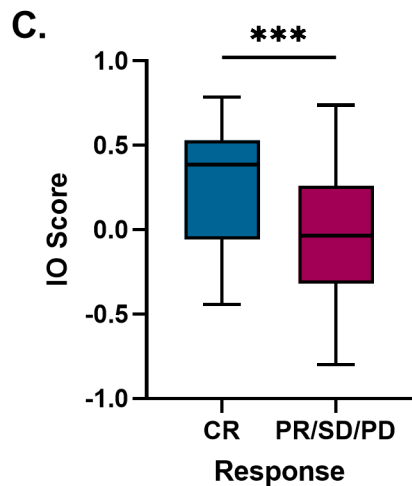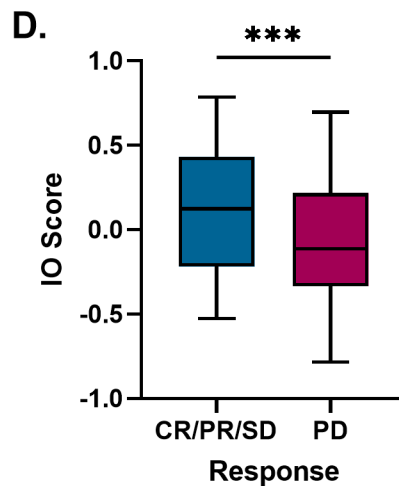

Supplement: MOESM1 [file 23370726]
