# Supplementary material for: Translation of the 27-gene immuno-oncology test (IO score) to predict outcomes in immune checkpoint inhibitor treated metastatic urothelial cancer patients
Source: Springer Nature journal article supplement (doi:10.1186/s12967-022-03563-9), 2022-08-16
Supplement: MOESM5 [file 23370726]

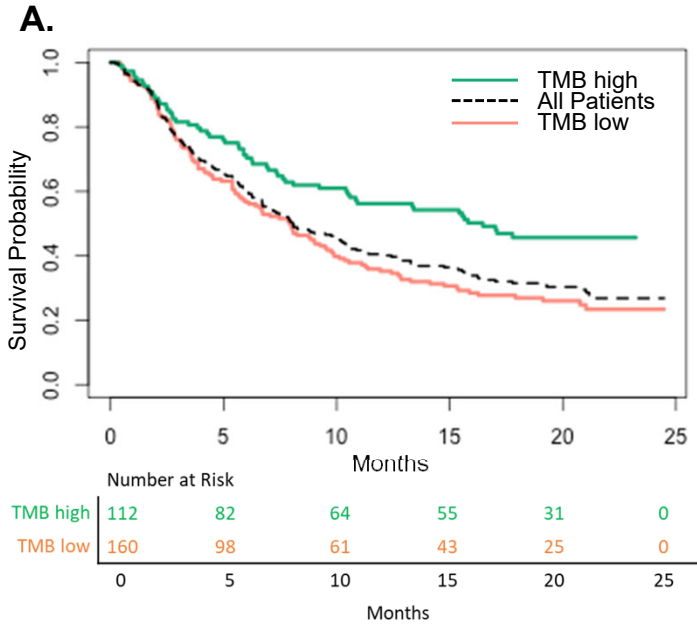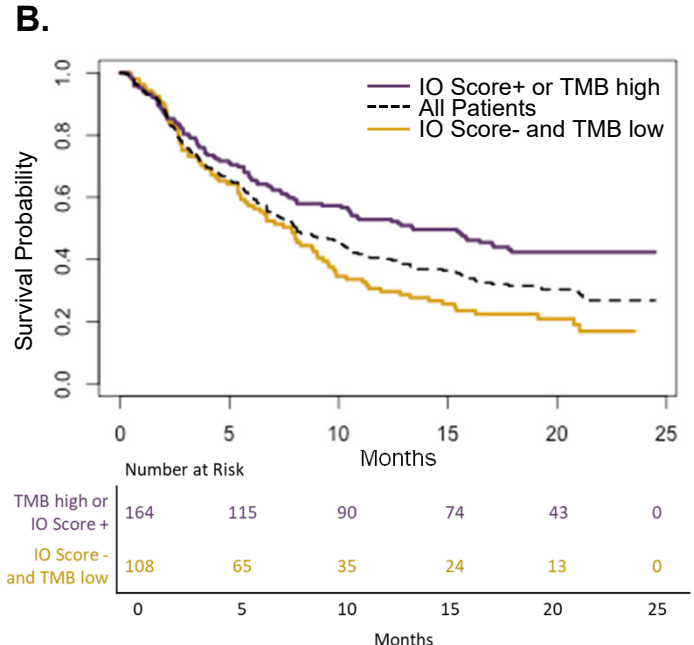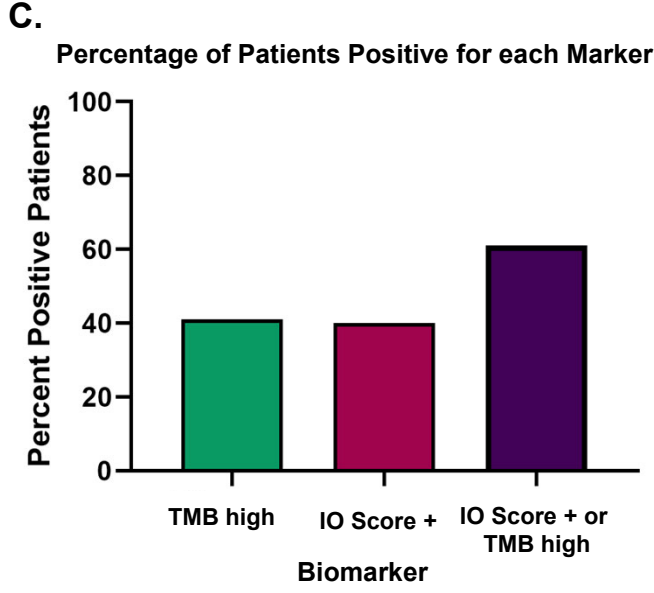

**D.**

Median and 2-year OS for each Marker and the Combined Population

|                        | Median OS (mos) | 2 Year OS |
|------------------------|-----------------|-----------|
| IO Score + or TMB high | 13.4            | 42.3%     |
| IO Score +             | 15.6            | 41.5%     |
| TMB high               | 16.5            | 45.7%     |
